# Supplementary material for: Neuraminidase Inhibitory Activity and Constituent Characterization of Fagopyrum dibotrys
Source: MDPI journal article supplement (doi:10.3390/molecules22111998), 2017-11-18
Supplement: s1 [file s1]

Article

# Neuraminidase inhibitory activity and constituent characterization of *Fagopyrum dibotrys*.

Xiang Zhang<sup>1</sup>, Yu Cao<sup>1</sup>, Jinhua Li<sup>1</sup>, Ailin Liu<sup>2</sup>, Haibo Liu<sup>1\*</sup>, Linfang Huang<sup>\*,1</sup>

<sup>1</sup>Institute of Medicinal Plant Development, Peking Union Medical College & Chinese Academy of Medical Sciences, Beijing 100193, China, <sup>2</sup>Institute of Materia Medica, Chinese Academy of Medical Sciences & Peking Union Medical College, Beijing, 100050, China

**Table S1** The absolute values of INT on 8 main chemical compounds in *F. dibotrys*.

| Compounds       | INT(Kcal/mol) |
|-----------------|---------------|
| rutin           | 149.599       |
| hesperidin      | 210.412       |
| procyanidin B2  | 170.195       |
| quercitrin      | 124.383       |
| eriodictyol     | 122.719       |
| (-)-epicatechin | 73.401        |
| (+)-catechin    | 108.114       |
| caffeic acid    | 111.820       |
